# Supplementary material for: Prognostic value of progesterone receptor in solid pseudopapillary neoplasm of the pancreas: evaluation of a pooled case series
Source: Springer Nature journal article supplement (doi:10.1186/s12876-018-0914-8), 2018-12-01
Supplement: MOESM1 [file 16343484]

**Supplementary Table I. Univariable cox regression model of DFS and DSS for patients with SPNP in our cohort**

| <b>Prognostic factors</b> | <b><math>\beta</math></b> | <b>Hazard ratio (95%CI)</b> | <b><i>P</i> value</b> |
|---------------------------|---------------------------|-----------------------------|-----------------------|
| <b>DFS (n=66)</b>         |                           |                             |                       |
| Age ( $\geq 40$ y)        | -0.234                    | 0.79 (0.14-4.39)            | 0.788                 |
| Gender (male)             | 0.432                     | 1.54 (0.18-13.23)           | 0.694                 |
| Location (Head/Neck)      | -0.387                    | 0.68 (0.12-3.71)            | 0.655                 |
| Tumor size ( $\geq 7$ cm) | 2.517                     | 12.39 (1.44-106.50)         | <b>0.003</b>          |
| *Ki67 ( $\geq 5\%$ )      | 2.292                     | 9.90 (1.07-91.78)           | <b>0.044</b>          |
| *PR (negative)            | 3.176                     | 23.95 (2.17-264.31)         | <b>0.001</b>          |
| <b>DSS (n=66)</b>         |                           |                             |                       |
| Age ( $\geq 40$ y)        | -0.883                    | 0.41 (0.46-3.70)            | 0.430                 |
| Gender (male)             | 0.152                     | 1.16 (0.13-10.42)           | 0.892                 |
| Location (Head/Neck)      | -0.045                    | 0.96 (0.16-5.73)            | 0.961                 |
| Tumor size ( $\geq 7$ cm) | 2.440                     | 11.47 (1.28-102.95)         | <b>0.006</b>          |
| *Ki67 ( $\geq 5\%$ )      | -3.039                    | 0.06 (0.01-198.30)          | 0.748                 |
| *PR (negative)            | 3.847                     | 46.85 (2.93-750.91)         | <b>&lt;0.001</b>      |

\* Number of SPN patients with Ki67 and PR results are 61 and 59 respectively

# Factors such as presence of symptom, tumor markers and other immunohistochemical parameters did not show significantly correlation with DFS and DSS (Data not shown)

**Supplementary Table II. Demographic and clinicopathological characteristics of 214 patients with SPNP in literature review**

| <b>Characteristics</b>                   |                                                   | <b>Parameters</b> |
|------------------------------------------|---------------------------------------------------|-------------------|
| <b>Age</b> ( $\Sigma=214$ )              | Mean (y, $\pm$ SD)                                | 24.84 $\pm$ 15.04 |
|                                          | Median (y, range)                                 | 18 (7-79)         |
| <b>Gender</b> ( $\Sigma=214$ )           | Male (%)                                          | 17 (7.9%)         |
|                                          | Female (%)                                        | 197 (92.1%)       |
| <b>Race</b> ( $\Sigma=214$ )             | Caucasoid (%)                                     | 136 (63.6%)       |
|                                          | Mongoloid (%)                                     | 74 (34.6%)        |
|                                          | Black (%)                                         | 4 (1.9%)          |
| <b>Location</b> ( $\Sigma=208$ )         | Head/Neck (%)                                     | 95 (45.7%)        |
|                                          | Body/Tail (%)                                     | 113 (54.3%)       |
| <b>Tumor size</b> ( $\Sigma=190$ )       | Mean (cm, $\pm$ SD)                               | 6.62 $\pm$ 3.49   |
|                                          | Median (cm, range)                                | 6 (1-18)          |
| <b>Symptom</b> ( $\Sigma=144$ )          | Abdominal pain (%)                                | 66 (45.8%)        |
|                                          | Asymptomatic (%)                                  | 32 (22.2%)        |
|                                          | Mass (%)                                          | 27 (18.8%)        |
|                                          | Other (%)                                         | 19 (13.2%)        |
| <b>Immunohistochemistry</b>              | $\Sigma 35$ Vim (Positive, %)                     | 35 (100.0%)       |
|                                          | $\Sigma 24$ PR (Positive, %)                      | 17 (70.8%)        |
|                                          | $\Sigma 43$ Syn (Positive, %)                     | 12 (27.9%)        |
|                                          | $\Sigma 15$ CD10 (Positive, %)                    | 13 (86.7%)        |
|                                          | $\Sigma 11$ Ki67 (Low proliferation activity, %)  | 5 (45.5%)         |
|                                          | $\Sigma 9$ $\beta$ -catenin (Positive, %)         | 9 (100.0%)        |
|                                          | $\Sigma 39$ CgA (Negative, %)                     | 32 (82.1%)        |
| <b>Operation Method</b> ( $\Sigma=204$ ) | Pancreaticoduodenectomy (%)                       | 61 (29.9%)        |
|                                          | Duodenum preserving pancreatic head resection (%) | 10 (4.9%)         |
|                                          | Total pancreatectomy (%)                          | 4 (2.0%)          |
|                                          | Enucleation (%)                                   | 17 (8.3%)         |
|                                          | Central pancreatectomy (%)                        | 19 (9.3%)         |
|                                          | Distal pancreatectomy (%)                         | 50 (24.5%)        |
|                                          | Distal pancreatectomy with splenectomy (%)        | 43 (21.1%)        |
| <b>Follow-up</b> ( $\Sigma=214$ )        | Mean (mo, $\pm$ SD)                               | 51.92 $\pm$ 48.87 |
|                                          | Median (mo, range)                                | 36 (1-205)        |

|                                                            |           |
|------------------------------------------------------------|-----------|
| <b>Recurrence/metastasis (<math>\Sigma=214</math>)</b>     | 17 (7.9%) |
| <b>Disease related mortality (<math>\Sigma=214</math>)</b> | 5 (2.3%)  |
